# Supplementary material for: Motivational Strategies, Language Learning Strategies, and Literal and Inferential Comprehension in Second Language Chinese Reading: A Structural Equation Modeling Study
Source: Frontiers journal article supplement (doi:10.3389/fpsyg.2021.707538), 2021-08-12
Supplement: Presentation_1.pdf [file Presentation_1.pdf]

## Appendices

### Appendix A

#### Participants by Country

| Country     | Frequency | Percent |
|-------------|-----------|---------|
| Afghanistan | 1         | 0.2     |
| America     | 1         | 0.2     |
| Australia   | 1         | 0.2     |
| Azerbaijan  | 1         | 0.2     |
| Belgium     | 1         | 0.2     |
| Botswana    | 1         | 0.2     |
| Brazil      | 1         | 0.2     |
| Britain     | 4         | 0.7     |
| Bulgaria    | 2         | 0.4     |
| Byelorussia | 1         | 0.2     |
| Cambodia    | 12        | 2.2     |
| Canada      | 1         | 0.2     |
| Chile       | 2         | 0.4     |
| Columbia    | 4         | 0.7     |
| Congo       | 1         | 0.2     |
| Costa Rica  | 3         | 0.5     |
| Cuba        | 1         | 0.2     |
| Denmark     | 3         | 0.5     |
| Ecuador     | 1         | 0.2     |
| Emirates    | 1         | 0.2     |
| Fiji        | 1         | 0.2     |
| France      | 5         | 0.9     |
| Germany     | 1         | 0.2     |
| Hungary     | 2         | 0.4     |
| India       | 1         | 0.2     |
| Indonesia   | 62        | 11.3    |
| Iran        | 1         | 0.2     |
| Israel      | 1         | 0.2     |
| Italy       | 11        | 2.0     |
| Jamaica     | 2         | 0.4     |
| Japan       | 45        | 8.2     |
| Jordan      | 1         | 0.2     |
| Kazakhstan  | 16        | 2.9     |
| Korea       | 104       | 19.0    |
| Kyrgyzstan  | 7         | 1.3     |
| Laos        | 24        | 4.4     |
| Madagascar  | 3         | 0.5     |
| Malaysia    | 1         | 0.2     |

|              |            |              |
|--------------|------------|--------------|
| Mexico       | 2          | 0.4          |
| Mongolia     | 20         | 3.7          |
| Nepal        | 3          | 0.5          |
| New Zealand  | 1          | 0.2          |
| Peru         | 4          | 0.7          |
| Philippine   | 18         | 3.3          |
| Poland       | 1          | 0.2          |
| Romania      | 2          | 0.4          |
| Russia       | 37         | 6.8          |
| Saudi Arabia | 1          | 0.2          |
| Spain        | 1          | 0.2          |
| Sweden       | 2          | 0.4          |
| Switzerland  | 1          | 0.2          |
| Syria        | 2          | 0.4          |
| Thailand     | 97         | 17.7         |
| Togo         | 1          | 0.2          |
| Turkey       | 3          | 0.5          |
| Turkmenistan | 2          | 0.4          |
| Ukraine      | 4          | 0.7          |
| Uzbekistan   | 6          | 1.1          |
| Vietnam      | 7          | 1.3          |
| Yemen        | 1          | 0.2          |
| <b>Total</b> | <b>547</b> | <b>100.0</b> |

## Appendix B

### Strategy Use Questionnaire for Chinese Reading

**Directions:** The purpose of the survey is to collect information about strategies you, as a student of learning Chinese as a second language, used or thought when reading in Chinese. Choose 0 (never), 1 (rarely), 2 (sometimes), 3 (often), 4 (usually), or 5 (always) on each statement that best describes how you did or thought during the Chinese reading.

#### Part A: Cognitive Strategies

| <i>Strategy</i>                                                                                                                                     | <i>Never</i> |   |   |   |   |   | <i>Always</i> |
|-----------------------------------------------------------------------------------------------------------------------------------------------------|--------------|---|---|---|---|---|---------------|
| 1. I tried to identify main ideas in the text.                                                                                                      | 0            | 1 | 2 | 3 | 4 | 5 |               |
| 2. I tried to understand the content of the text without looking up every word                                                                      | 0            | 1 | 2 | 3 | 4 | 5 |               |
| 3. I analyzed what the author was trying to say in the text.                                                                                        | 0            | 1 | 2 | 3 | 4 | 5 |               |
| 4. I made sure I understood hidden meanings in the text.                                                                                            | 0            | 1 | 2 | 3 | 4 | 5 |               |
| 5. I summarized the main information of the text.                                                                                                   | 0            | 1 | 2 | 3 | 4 | 5 |               |
| 6. I thought about what would happen next while reading.                                                                                            | 0            | 1 | 2 | 3 | 4 | 5 |               |
| 7. I tried to understand the relationships between ideas in the texts.                                                                              | 0            | 1 | 2 | 3 | 4 | 5 |               |
| 8. I drew logical inferences about the text.                                                                                                        | 0            | 1 | 2 | 3 | 4 | 5 |               |
| 9. I translated the texts and the questions from Chinese into my native language.                                                                   | 0            | 1 | 2 | 3 | 4 | 5 |               |
| 10. I paraphrased or simplified the information in the text to remember.                                                                            | 0            | 1 | 2 | 3 | 4 | 5 |               |
| 11. I took notes or underline the text while reading to help me remember what I had read.                                                           | 0            | 1 | 2 | 3 | 4 | 5 |               |
| 12. I used typographical features, such as bold face, italics, pictures, tables and figures in the text to identify information and refer to later. | 0            | 1 | 2 | 3 | 4 | 5 |               |
| 13. I related the information from the text to my prior knowledge about the topic being read.                                                       | 0            | 1 | 2 | 3 | 4 | 5 |               |
| 14. I related the new information with the previous information I had read in the text.                                                             | 0            | 1 | 2 | 3 | 4 | 5 |               |
| 15. I used Chinese radical knowledge to guess meanings of unknown words in the text.                                                                | 0            | 1 | 2 | 3 | 4 | 5 |               |
| 16. I used the knowledge of synonym and antonym to guess the meaning of unknown words in text.                                                      | 0            | 1 | 2 | 3 | 4 | 5 |               |

|                                                                                             |   |   |   |   |   |   |
|---------------------------------------------------------------------------------------------|---|---|---|---|---|---|
| 17. I knew which information in the text was more or less important.                        | 0 | 1 | 2 | 3 | 4 | 5 |
| 18. I guessed meanings of unknown words using root words.                                   | 0 | 1 | 2 | 3 | 4 | 5 |
| 19. I used a known character to guess the meanings of the unknown characters within a word. | 0 | 1 | 2 | 3 | 4 | 5 |
| 20. I used knowledge of prefixes and suffixes to guess the meaning of unknown words.        | 0 | 1 | 2 | 3 | 4 | 5 |

### Part B: Metacognitive Strategies

| <i>Strategy</i>                                                                                               | <i>Never</i> |   |   |   |   | <i>Always</i> |
|---------------------------------------------------------------------------------------------------------------|--------------|---|---|---|---|---------------|
| 1. I planned what to do before I began to read texts.                                                         | 0            | 1 | 2 | 3 | 4 | 5             |
| 2. I made sure I clarified the goals of the tasks before reading the text.                                    | 0            | 1 | 2 | 3 | 4 | 5             |
| 3. I considered essential steps needed to complete the tasks before I began to read.                          | 0            | 1 | 2 | 3 | 4 | 5             |
| 4. I took an overall view of the text to see what it was about before reading it.                             | 0            | 1 | 2 | 3 | 4 | 5             |
| 5. I noticed the characteristics of the text, such as length, organization, sequence of events or procedures. | 0            | 1 | 2 | 3 | 4 | 5             |
| 6. I knew what to do if my intended plans did not work efficiently.                                           | 0            | 1 | 2 | 3 | 4 | 5             |
| 7. I flipped through the reading text before I actually started to do it.                                     | 0            | 1 | 2 | 3 | 4 | 5             |
| 8. I thought about whether the content of the text fitted my reading purposes when I was reading.             | 0            | 1 | 2 | 3 | 4 | 5             |
| 9. I checked my comprehension as I moved along the reading.                                                   | 0            | 1 | 2 | 3 | 4 | 5             |
| 10. I checked my understanding when I came across new information in the text.                                | 0            | 1 | 2 | 3 | 4 | 5             |
| 11. I knew when I should read more carefully during reading.                                                  | 0            | 1 | 2 | 3 | 4 | 5             |
| 12. I was aware of the time limitation of the reading tasks.                                                  | 0            | 1 | 2 | 3 | 4 | 5             |
| 13. I knew how much the texts and tasks remain to be done while reading.                                      | 0            | 1 | 2 | 3 | 4 | 5             |
| 14. I knew when I lost concentration during reading.                                                          | 0            | 1 | 2 | 3 | 4 | 5             |
| 15. I noticed when and where I was confused in the text.                                                      | 0            | 1 | 2 | 3 | 4 | 5             |
| 16. I immediately correct my misunderstanding in the text when found.                                         | 0            | 1 | 2 | 3 | 4 | 5             |
| 17. I evaluated the accuracy of the information presented in the                                              | 0            | 1 | 2 | 3 | 4 | 5             |

|                                                                                                       |   |   |   |   |   |   |
|-------------------------------------------------------------------------------------------------------|---|---|---|---|---|---|
| text.                                                                                                 |   |   |   |   |   |   |
| 18. I checked to see if my understanding of the text was supported by evidence available in the text. | 0 | 1 | 2 | 3 | 4 | 5 |
| 19. I checked if I understood the texts and tasks.                                                    | 0 | 1 | 2 | 3 | 4 | 5 |
| 20. I evaluated my plans or goals of my reading constantly.                                           | 0 | 1 | 2 | 3 | 4 | 5 |
| 21. I critically evaluated the information in the text.                                               | 0 | 1 | 2 | 3 | 4 | 5 |

### Part C: Motivational Strategies

| <i>Strategy</i>                                                                                         | <i>Never</i> |   |   |   |   | <i>Always</i> |
|---------------------------------------------------------------------------------------------------------|--------------|---|---|---|---|---------------|
| 1. I tried my best to complete the reading task although I may not do it well.                          | 0            | 1 | 2 | 3 | 4 | 5             |
| 2. I thought of the desired performance I aimed to achieve.                                             | 0            | 1 | 2 | 3 | 4 | 5             |
| 3. I motivated myself to complete the reading task even if I found it was difficult.                    | 0            | 1 | 2 | 3 | 4 | 5             |
| 4. Even the text was dull and interesting, I managed to work on until I finished.                       | 0            | 1 | 2 | 3 | 4 | 5             |
| 5. I made encouraging statements to myself so as to continue to try hard and do my best during reading. | 0            | 1 | 2 | 3 | 4 | 5             |
| 6. I set goals for the grades I wanted to get in the reading.                                           | 0            | 1 | 2 | 3 | 4 | 5             |

## Appendix C

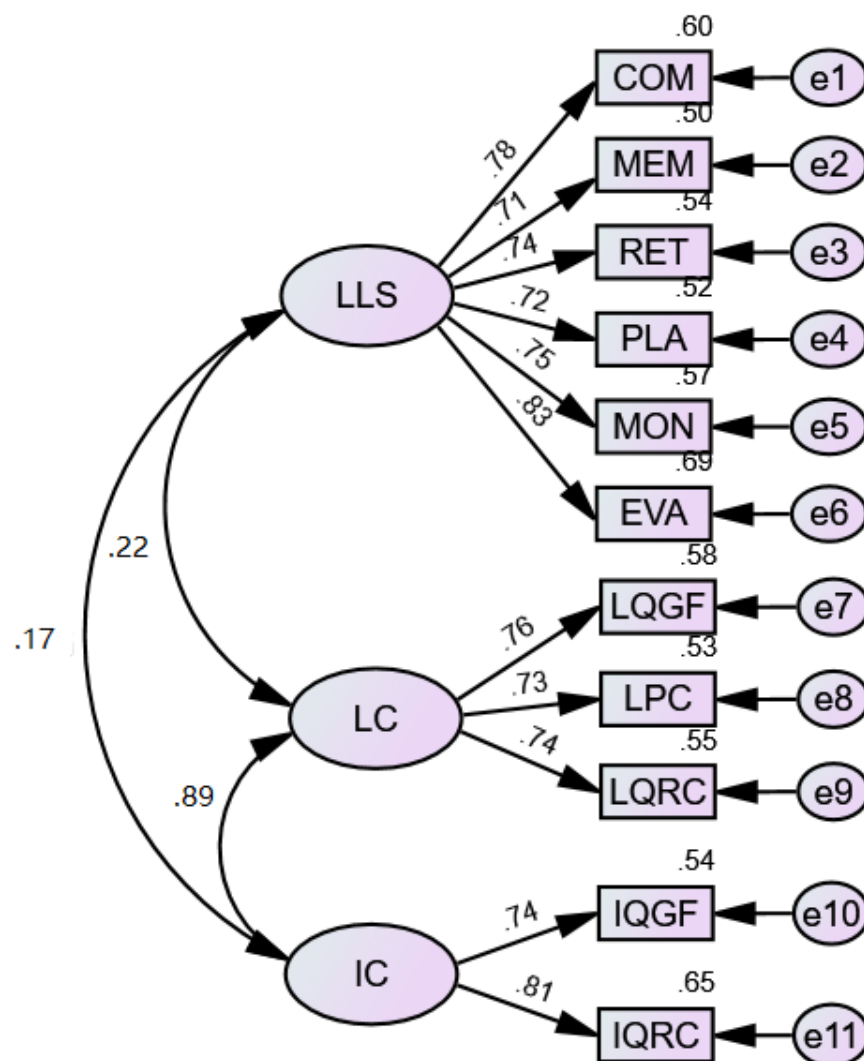

Figure 3. Results for the measurement model

*Note.* LLS: Language learning strategies; COM: Comprehending; MEM: Memory; RET: Retrieval; PLA: Planning; MON: Monitoring; EVA: Evaluating; LC: Literal comprehension; LQGF: Literal questions in gap-filling; LPC: Long passage comprehension; LQRC: Literal questions in reading comprehension; IC: Inferential comprehension; IQGF: Inferential questions in gap-filling; IQRC: Inferential questions in reading comprehension
